# Supplementary material for: Heterogeneous virulence of pandemic 2009 influenza H1N1 virus in mice
Source: PubMed Central journal article supplement (PMC3444956; doi:10.1186/1743-422x-9-104), 2012-06-06
Supplement: 1743-422X-9-104-S1.pdf [file 1743-422X-9-104-S1.pdf]

## Additional file 1

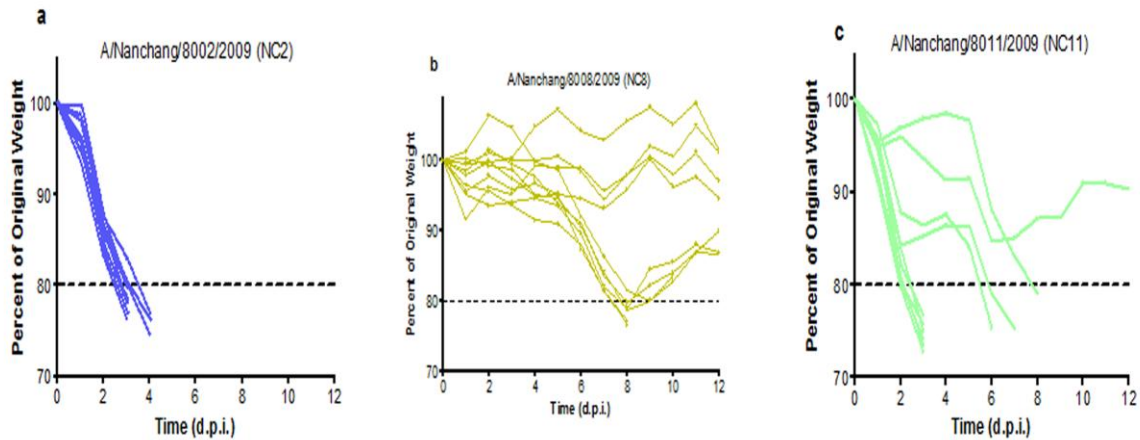

**Comparison of weight loss kinetics in different strains of pandemic influenza H1N1** Viral strains; NC2, NC8 and NC11 was analyzed in C57/BL6 mice (n = 10/group). Viral infection was established with  $10^5$  EID<sub>50</sub> of NC2, NC11 and  $10^6$  EID<sub>50</sub> of NC8 and animals were observed up to 14 days. Weight losses in each animal infected with NC2 (a), NC8 (b) and NC11 (c). Significant differences were observed at 3 dpi, NC8 vs NC2 ( $P < 0.0001$ ), NC8 vs NC11 (0.0007).
