# Supplementary material for: Heterogeneous virulence of pandemic 2009 influenza H1N1 virus in mice
Source: PubMed Central journal article supplement (PMC3444956; doi:10.1186/1743-422x-9-104), 2012-06-06
Supplement: 1743-422X-9-104-S2.pdf [file 1743-422X-9-104-S2.pdf]

## Additional file 2

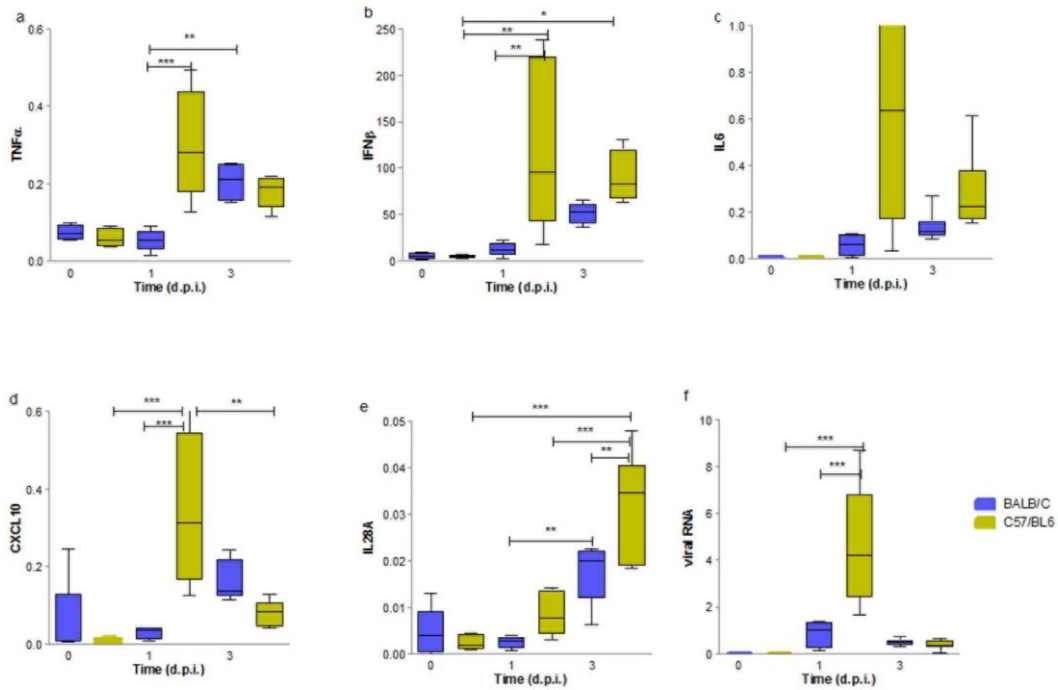

### Comparison of host immune response between A/Nanchang/8002/2009 infected C57/BL6 and BALB/C mice

Kinetics of host immune response was observed in C57/BL6 mice infected with  $10^5$  EID<sub>50</sub> of A/Nanchang/8002/2009 H1N1 (NC2). Animals were euthanized at 0, 1 and 3 dpi. Lung mRNA levels of major proinflammatory markers were determined by real time RT-PCR. Results are presented as mean  $\pm$  SEM of mRNA levels normalized with mouse  $\beta$ -actin gene. Statistical differences were calculated by Mann Whitney U test. \*\*\* - P < 0.0001, \*\* - P < 0.001, \* - P < 0.01
