# Supplementary material for: Heterogeneous virulence of pandemic 2009 influenza H1N1 virus in mice
Source: PubMed Central journal article supplement (PMC3444956; doi:10.1186/1743-422x-9-104), 2012-06-06
Supplement: 1743-422X-9-104-S3.pdf [file 1743-422X-9-104-S3.pdf]

### Additional file 3

#### Mutation analysis of selected strains of pdm H1N1 influenza virus

|                                    |            | A/Nanchang/8002/2009<br>(NC2) | A/Nanchang/8008/2009<br>(NC8) | A/Nanchang/8011/2009<br>(NC11) |
|------------------------------------|------------|-------------------------------|-------------------------------|--------------------------------|
| Sample collection                  |            | Dec 9 2009                    | Dec 19 2009                   | Dec 22 2009                    |
| Age (yrs)                          |            | 27                            | 15                            | 33                             |
| Gender                             |            | M                             | F                             | F                              |
| Temp. (°C)                         |            | 39.4                          | 38.5                          | NA                             |
| Hospitalization                    |            | ✓                             | ✓                             | ✓                              |
| Complication                       |            |                               |                               |                                |
| Pregnancy/ other<br>Co-morbidities |            |                               |                               |                                |
| <b>H<br/>A</b>                     | Genbank ID | CY089608                      | CY089616                      | CY089624                       |
|                                    | K71N       |                               |                               |                                |
|                                    | P100S      | ✓                             | ✓                             | ✓                              |
|                                    | D144E      |                               |                               |                                |
|                                    | S145P      |                               | ✓                             | ✓                              |
|                                    | I208L      |                               |                               | ✓                              |
|                                    | T214A      |                               |                               |                                |
|                                    | S220T      | ✓                             | ✓                             | ✓                              |
|                                    | I338V      | ✓                             | ✓                             | ✓                              |
|                                    | S340F      |                               |                               |                                |
|                                    | E391K      | ✓                             |                               |                                |
| A409V                              | ✓          |                               | ✓                             |                                |
| H416P                              |            |                               |                               |                                |
| <b>N<br/>A</b>                     | Genbank ID | CY089610                      | CY089618                      | CY089626                       |
|                                    | N42S       |                               |                               |                                |
|                                    | V106I      | ✓                             | ✓                             | ✓                              |
| N248D                              | ✓          | ✓                             | ✓                             |                                |
| <b>N<br/>P</b>                     | Genbank    | CY089609                      | CY089617                      | CY089625                       |
|                                    | V100I      | ✓                             | ✓                             | ✓                              |
|                                    | D101N      |                               |                               | ✓                              |
| <b>M<br/>2</b>                     | Genbank ID | CY089611                      | CY089619                      | CY089627                       |
|                                    | C321G      | ✓                             | ✓                             | ✓                              |
| <b>N<br/>S<br/>1</b>               | Genbank ID | CY089612                      | CY089620                      | CY089628                       |
|                                    | I123V      | ✓                             | ✓                             | ✓                              |
|                                    | I156V      | ✓                             |                               |                                |
|                                    | N205S      |                               |                               | ✓                              |

mutations are compared with prototypic strain: A/California/07/2009 H1N1, NA – not available, ND – Not done
